# Supplementary material for: Limited role of mast cells during infection with the parasitic nematode Litomosoides sigmodontis
Source: PubMed Central journal article supplement (PMC7423137; doi:10.1371/journal.pntd.0008534), 2020-07-31
Supplement: pntd.0008534.s001.pdf [file pntd.0008534.s001.pdf]

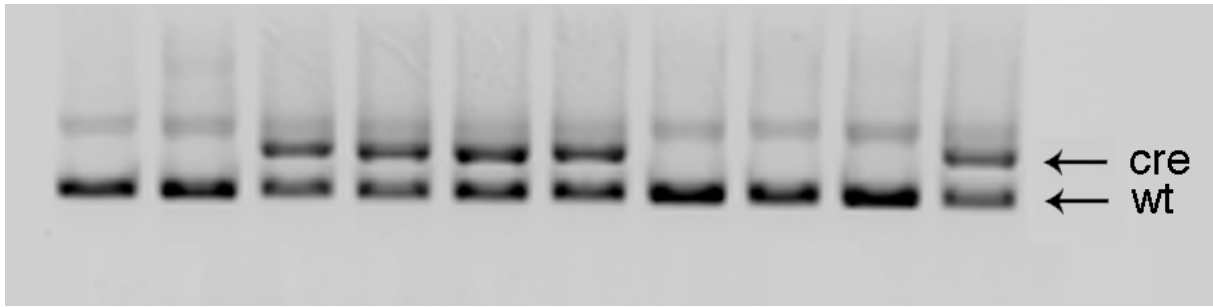

S1 Fig: PCR for genotyping.

To verify the genotype of the mice, DNA was extracted from earhole biopsies. *Cpa3<sup>cre/wt</sup>* mice were genotyped by PCR using a combination of three oligonucleotides (common 5': GGA CTG TTC ATC CCC AGG AAC C; 3'-WT: CTG GCG TGC TTT TCA TTC TGG; 3'-KI: GTC CGG ACA CGC TGA ACT TG), yielding 320 bp (*Cpa3<sup>+</sup>*) and 450 bp (*Cpa3<sup>cre</sup>*) products for heterozygous *Cpa3<sup>cre</sup>* mice. Cycling conditions were as followed: 15 min polymerase activation at 95°C, 40 cycles at 95°C for 30 sec, 57°C for 30 sec and 72°C for 40 sec.
