# Supplementary material for: Limited role of mast cells during infection with the parasitic nematode Litomosoides sigmodontis
Source: PubMed Central journal article supplement (PMC7423137; doi:10.1371/journal.pntd.0008534), 2020-07-31
Supplement: pntd.0008534.s002.pdf [file pntd.0008534.s002.pdf]

**A**

noninfected

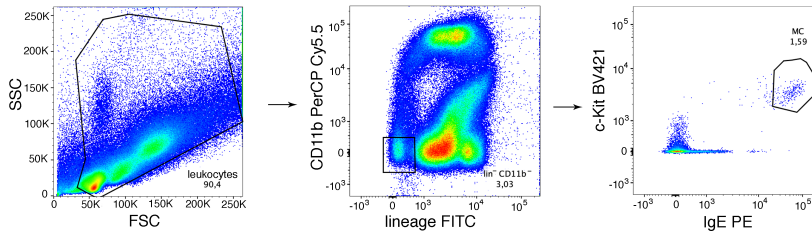**B**

day 30 p.i.

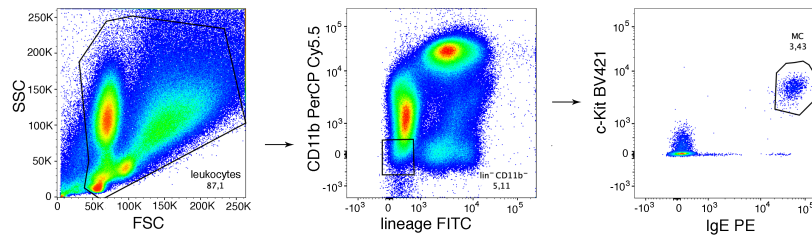**S2 Fig: Gating strategy.**

Representative dot blots showing the gating strategy. Thoracic cavity cells were isolated from noninfected mice (A) and day 30 *L. sigmodontis* infected mice (B). Mast cells were defined as lineage (CD4, CD8 and CD19)<sup>-</sup> CD11b<sup>-</sup> leukocytes that are c-Kit (CD117)<sup>+</sup> and IgE<sup>+</sup>. 1 x 10<sup>6</sup> cells were gated for the analysis.
